# Supplementary material
Source: PubMed Central journal article supplement (PMC2745290)
Supplement: NIHMS104391-supplement-01.pdf [file NIHMS104391-supplement-01.pdf]

**Supplemental Table 1. Mouse strains utilized in these studies.**

| Strain (common name)                                                                 | Source                               | Notes (all strains bred at Trudeau)                                                                                                                                                                                                                                                                                                |
|--------------------------------------------------------------------------------------|--------------------------------------|------------------------------------------------------------------------------------------------------------------------------------------------------------------------------------------------------------------------------------------------------------------------------------------------------------------------------------|
| C57BL/6J (B6)                                                                        | Jackson Laboratory                   |                                                                                                                                                                                                                                                                                                                                    |
| BALB/c                                                                               | Jackson Laboratory                   |                                                                                                                                                                                                                                                                                                                                    |
| B6.129S2-IgH-6 <sup>tm1Cgn</sup> /J (μMT)                                            | Jackson Laboratory                   | B cell deficient on B6 genetic background                                                                                                                                                                                                                                                                                          |
| BALB/c-Il4ra <sup>tm1Sz</sup> /J (IL-4Rα <sup>-/-</sup> )                            | Jackson Laboratory                   |                                                                                                                                                                                                                                                                                                                                    |
| B6.129S2-H2 <sup>d1Ab1-Ea</sup> /J (MHCII <sup>-/-</sup> )                           | Jackson Laboratory                   |                                                                                                                                                                                                                                                                                                                                    |
| B6.129S-Tnf <sup>tm1Gki</sup> /J (TNFα <sup>-/-</sup> )                              | Jackson Laboratory                   |                                                                                                                                                                                                                                                                                                                                    |
| B6.129S2-Lta <sup>tm1Dch</sup> /J (LTα <sup>-/-</sup> )                              | Jackson Laboratory                   |                                                                                                                                                                                                                                                                                                                                    |
| B6.129P2-II2 <sup>tm1Hor</sup> /J (IL-2 <sup>-/-</sup> )                             | Jackson Laboratory                   |                                                                                                                                                                                                                                                                                                                                    |
| B6.129P2-II4 <sup>tm1Cgn</sup> /J (IL-4 <sup>-/-</sup> )                             | Jackson Laboratory                   |                                                                                                                                                                                                                                                                                                                                    |
| B6.129P2-II10 <sup>tm1Cgn</sup> /J (IL-10 <sup>-/-</sup> )                           | Jackson Laboratory                   |                                                                                                                                                                                                                                                                                                                                    |
| C.IgH-J <sup>tm1Dhu</sup> (JHD)                                                      | Taconic                              | B cell deficient mice on BALB/c genetic background                                                                                                                                                                                                                                                                                 |
| C57BL/6-Tg(IghelMD4)4Ccg/J IgH-6 <sup>tm1Cgn</sup> /J (MD4μMT)                       | Dr. J. Kearney (Univ. of Alabama)    | MD4 BCR transgenic mice (1988 Nature 334:676) were crossed to μMT mice to generate mice with a monoclonal B cell population specific for Hen Egg Lysozyme (HEL)                                                                                                                                                                    |
| C.129-II4 <sup>tm1Lky</sup> /J (BALB/c 4get)                                         | Dr. M. Mohrs (Trudeau Institute)     | A knockin replaces the endogenous IL-4 gene with an Il4/IRES/EGFP gene (IL4 activity remains intact). This leads to generation of a bicistronic transcript under the control of endogenous regulatory elements. Cells activated to express IL4 mRNA will express EGFP. IL-4 reporter backcrossed to BALB/c (2001 Immunity 15:303). |
| B6.129-II4 <sup>tm1Lky</sup> /J (B6 4get)                                            | Dr. M. Mohrs (Trudeau Institute)     | A knockin replaces the endogenous IL-4 gene with an Il4/IRES/EGFP gene (IL4 activity remains intact). This leads to generation of a bicistronic transcript under the control of endogenous regulatory elements. Cells activated to express IL4 mRNA will express EGFP. IL-4 reporter backcrossed to B6 (2001 Immunity 15:303).     |
| B6.129-II4 <sup>tm1Lky</sup> /J IgH-6 <sup>tm1Cgn</sup> /J (4getμMT)                 | Dr. M. Mohrs (Trudeau Institute)     | The IL-4 reporter mouse on the B6 background (see above) was crossed to μMT mice to generate IL-4 reporter mice that lack B cells.                                                                                                                                                                                                 |
| C.129-II4 <sup>tm1Lky</sup> /J Il4ra <sup>tm1Sz</sup> /J (4getIL4Rα <sup>-/-</sup> ) | Dr. M. Mohrs (Trudeau Institute)     | The IL-4 reporter mouse on the BALB/c background (see above) was crossed to IL-4Ra knockout mice to generate IL-4 reporter mice that are also IL-4Ra deficient.                                                                                                                                                                    |
| μs <sup>-/-</sup>                                                                    | Dr. R. Corley (Boston Univ.)         | Mice that lack the secretory exon for IgM (1998 J. Immunol. 160:4776). Are incapable of secreting IgM antibody but can secrete class-switched antibodies                                                                                                                                                                           |
| AID <sup>-/-</sup>                                                                   | Dr. R. Gerstein (Univ. Mass.)        | Mice deficient in activation induced cytidine deaminase (AID) (2000 Cell 102:541). Mice cannot class-switch and cannot secrete class-switched antibodies                                                                                                                                                                           |
| μs <sup>-/-</sup> AID <sup>-/-</sup>                                                 | Dr. Troy Randall (Trudeau Institute) | Mice that lack AID and the secretory exon for IgM. These mice cannot secrete antibodies of any isotype.                                                                                                                                                                                                                            |

## **Supplemental Figure Legends- Wojciechowski et al**

### **Supplemental Figure 1. Protective immunity to *Hp* challenge infection is not controlled by B cell dependent lymphoid tissue organogenesis.**

(A) Lethally irradiated  $\mu$ MT recipients (950 rads) were reconstituted with either B6 or  $\mu$ MT BM ( $1 \times 10^7$  cells/recipient). Since the organogenesis of Peyer's patches and the development of the splenic T cell compartment is controlled by B cells during fetal ontogeny, all of the chimeras (all made in  $\mu$ MT hosts) have missing or abnormal Peyer's patches and spleen. (B)  $\mu$ MT mice reconstituted with B6 BM contain B cells while  $\mu$ MT mice reconstituted with  $\mu$ MT BM are B cell deficient. (C) The reconstituted mice were exposed to two rounds of *Hp* infection and drug treatment and were then challenged with 200 L3 *Hp*. Three weeks later, parasite burdens were determined for individual animals.

### **Supplemental Figure 2. Generation of bone marrow chimeras to assess the role of B cells in regulating Th2 primary and memory responses to *Hp*.**

(A) IL-4 reporter mice (4get mice) were generated by replacing the endogenous IL-4 gene with an IL-4/IRES/EGFP cassette that permits normal IL-4 expression and activity. Cells activated to express IL-4 mRNA will also express the bicistronic EGFP transcript under the control of endogenous IL-4 regulatory elements. To address the role of B cells in Th2 responses, the 4get mice were intercrossed with  $\mu$ MT mice to generate B cell deficient IL-4 reporter animals (4get $\mu$ MT). BM chimeric animals were then generated by lethally irradiating B cell deficient hosts ( $\mu$ MT) and reconstituting the mice with either 100% 4get BM (4get chimeras) or with 100% 4get $\mu$ MT BM (4get $\mu$ MT chimeras). The 4get chimeras express all hematopoietic cell lineages while the 4get $\mu$ MT chimeras lack B cells. The IL-4 reporter cassette (EGFP) is knocked into the IL-4 locus of

100% of the hematopoietic cells that are present in the chimeric mice. Therefore, 100% of T cells present in both the 4get and 4get $\mu$ MT chimeras are competent to express the IL-4 reporter cassette, allowing us to use EGFP expression to follow Th2 development in vivo in the presence and absence of B cells. (B) MLN cells from 4get and 4get $\mu$ MT chimeras that were infected 8 days earlier with L3 *Hp* were examined by flow cytometry for the expression of EGFP and CD62L on CD4<sup>+</sup> gated cells. Representative FACS plots are shown and the percentage of cells in each quadrant is indicated. (C) MLN cells were isolated from day 8 post-*Hp* infection 4get and 4get $\mu$ MT mice. The cells were stimulated in vitro for 4 hrs with platebound anti-CD3 in the presence of Brefeldin A. Cells were then subjected to intracellular cytokine staining and flow cytometric analysis. EGFP and IL-4 expression in CD4<sup>+</sup>EGFP<sup>+</sup> gated cells was analyzed. Representative FACS plots are shown and the percentage of cells in each quadrant is indicated.

**Supplemental Figure 3. Generation of mixed bone marrow chimeras to address the role of antibody in Th2 memory responses to *H. polygyrus*.** To assess whether secreted antibody regulates Th2 responses to *H. polygyrus*, we generated mixed BM chimeras. B cell deficient  $\mu$ MT mice were lethally irradiated and reconstituted with different mixtures of BM (1 x 10<sup>7</sup> total BM cells/recipient). Mice reconstituted with 75% 4get $\mu$ MT BM + 25%  $\mu$ MT BM are unable to generate B cells and are referred to as  $\mu$ MT chimeras. Mice reconstituted with 75% 4get $\mu$ MT BM + 25% B6 BM are able to generate all hematopoietic lineages, including B cells. The B cells in this chimera must develop from the B6 BM and are therefore normal wild type B cells. These mice are referred to as B-WT chimeras. Mice reconstituted with a mixture of 75% 4get $\mu$ MT BM plus 25%  $\mu$ s<sup>-/-</sup>AID<sup>-/-</sup> BM are able to generate all hematopoietic lineages, including B lymphocytes. The B cells in this mouse must all develop from the  $\mu$ s<sup>-/-</sup>AID<sup>-/-</sup> BM and thus are

unable to secrete antibody of any isotype. These mice are referred to as B- $\mu$ s<sup>-/-</sup>AID<sup>-/-</sup> chimeras. 75% of all other hematopoietic cells (i.e. all cells but the B cells) in each of these chimeras must develop from the 4get $\mu$ MT BM. Thus, 75% of all T cells in each chimera contain the IRES-EGFP reporter knocked into the 3' untranslated region of the IL-4 locus. These T cells are still competent to produce IL-4 and when the IL-4 locus is transcribed in these T cells, EGFP protein is produced.

**Supplemental Figure 4. Generation of mixed bone marrow chimeras to assess the role of B cell-derived MHCII in protection to *Hp*.** (A) An analysis of mixed BM chimeras was performed to address whether antigen presentation by B cells is necessary for immune protection to *H. polygyrus*. B cell deficient  $\mu$ MT mice were lethally irradiated and reconstituted with different mixtures of BM ( $1 \times 10^7$  total BM cells/recipient). Mice reconstituted with 100%  $\mu$ MT BM are unable to generate B cells and are referred to as  $\mu$ MT chimeras. Mice reconstituted with 75%  $\mu$ MT BM + 25% B6 BM are able to generate all hematopoietic lineages, including B cells. The B cells in this chimera must develop from the B6 BM and are therefore normal wild type B cells. These mice are referred to as B-WT chimeras. Mice reconstituted with a mixture of 75%  $\mu$ MT BM plus 25% MHCII<sup>-/-</sup> BM are able to generate all hematopoietic lineages, including B lymphocytes. However, the B cells in these mice are unable to express MHCII. These mice are referred to as B-MHCII<sup>-/-</sup> chimeras. (B-C) The B cell reconstitution profile was analyzed in the (B) peripheral blood and (C) the spleen after 8 weeks of reconstitution. Panel B shows a representative flow cytometric analysis of  $\mu$ MT, B-WT and B-MHCII<sup>-/-</sup> chimeras. The percentage of CD19<sup>+</sup> B cells is indicated. No differences were observed in the proportion of B cells present in blood of B-WT and B-MHCII<sup>-/-</sup> chimeras. (C) The number of CD19<sup>+</sup>IgM<sup>+</sup> B cells

present in the spleen of the chimeric mice was determined by flow cytometry and counting. No B cells were found in the  $\mu$ MT chimeras but equivalent numbers of B cells were found in the B-WT and B-MHCII<sup>-/-</sup> chimeras. Data are shown for individual mice (n=14 mice/group). (D) To assess class II expression on the various cell populations, spleen cells from reconstituted  $\mu$ MT, B-WT and B-MHCII<sup>-/-</sup> chimeras were stained with antibodies to CD19 and I-A<sup>b</sup>. Representative FACS plots are shown and the percentage of cells in each quadrant are indicated. As expected, B cells in the B-MHCII<sup>-/-</sup> chimeras do not express class II while B cells from the B-WT chimeras are classII<sup>+</sup>. The percentage of I-A<sup>b</sup>CD19<sup>neg</sup> cells (non-B APCs) is very similar in all three groups of mice.

**Supplemental Fig 5. Generation of mixed BM chimeras to determine whether *Hp* protective B cells must be activated by IL-4/IL-13.** (A) To determine whether B cells must receive an IL-4R $\alpha$ -dependent signal to mediate protection to *Hp*, B cell deficient mice (JHD) were lethally irradiated and reconstituted with different mixtures of BM (1 x 10<sup>7</sup> total BM cells/recipient). Mice reconstituted with a mixture of JHD BM (80% of mixture) + 4get BM (20% of mixture) are able to generate all hematopoietic lineages and all of the lineages are competent to express IL-4R $\alpha$ . The B cells in this chimera (referred to as B-4get chimeras) must develop from the 4get (IL-4 reporter mouse) BM. Therefore, the 3' untranslated region of the IL-4 gene present in all B cells has been replaced by a bicistronic IRES-EGFP reporter cassette. All of the B cells in the B-4get chimeras are still competent to produce IL-4, however when the IL-4 locus is transcribed in these B cells, the EGFP cassette is also transcribed and EGFP protein is produced. Likewise, irradiated B cell deficient mice reconstituted with a mixture of 80% JHD BM + 20% 4getIL-4R $\alpha$ <sup>-/-</sup> BM are also able to generate all hematopoietic lineages. The B cells in

this chimera (referred to as B-4getIL-4R $\alpha^{-/-}$  chimeras) must develop from the 4getIL-4R $\alpha^{-/-}$  BM. Again, the 3' UT region of the IL-4 gene present in all B cells contains a bicistronic IRES-EGFP reporter cassette. All of the B cells in the B-4getIL-4R $\alpha^{-/-}$  chimeras are still competent to produce IL-4, and when the IL-4 locus is transcribed in these B cells, the EGFP cassette is also transcribed and EGFP protein is produced. However, none of the B cells in the B-4getIL-4R $\alpha^{-/-}$  chimeras can express IL-4R $\alpha$ , leaving them unable to respond to IL-4 or IL-13. (B) Eight weeks post reconstitution, MLN cells from B-WT and B-IL4R $\alpha^{-/-}$  chimeras were isolated and analyzed by flow cytometry. The CD19<sup>+</sup> cells were gated from the live (PI<sup>neg</sup>), lymphoid gated CD3<sup>neg</sup> population and IL-4 expression (EGFP) was analyzed. A representative histogram for each group is shown. The percentage of B cells expressing EGFP is indicated. As controls for FACS gating, we included histograms from MLN cells isolated from uninfected 4get and 4getIL-4R $\alpha^{-/-}$  mice. The percentage of B cells competent to produced IL-4 was < 0.01% and was below the limit of detection of our assay (~0.01%).

**Supplemental Figure 6. Generation of mixed bone marrow chimeras to assess the in vivo role of cytokine-producing B cells.** To analyze the importance of cytokines expressed by B lineage cells in protection to *H. polygyrus*, we generated mixed BM chimeras. B cell deficient mice ( $\mu$ MT) were lethally irradiated and reconstituted with different mixtures of BM ( $1 \times 10^7$  total BM cells/recipient). Mice reconstituted with 100%  $\mu$ MT BM are unable to generate B cells and are referred to as  $\mu$ MT chimeras. Mice reconstituted with a mixture of  $\mu$ MT BM (75% of mixture) + B6 BM (25% of mixture) are able to generate all hematopoietic lineages, including B cells. The B cells in this chimera must develop from the B6 BM and are therefore normal wild type B cells. These mice are referred to as B-WT chimeras. Mice reconstituted with a mixture

of 75%  $\mu$ MT BM plus 25% cytokine deficient BM are able to generate all hematopoietic lineages, including B lymphocytes. The B cells in this mouse must all develop from the cytokine deficient BM and thus are unable to express the particular cytokine. These mice are referred to as B-cytokine<sup>-/-</sup> chimeras. Mixed BM chimeras of this type were made to address the role of various B cell-derived cytokines including IL-4, IL-2 and TNF $\alpha$ . As an additional control, mice were reconstituted with 100% IL-4<sup>-/-</sup>, IL-2<sup>-/-</sup> or TNF $\alpha$ <sup>-/-</sup> BM. These mice are able to generate all hematopoietic lineages including B cells. However, all hematopoietic cells in these mice are unable to express the relevant cytokine. These mice are referred to as IL-4<sup>-/-</sup> chimeras, IL-2<sup>-/-</sup> chimeras or TNF $\alpha$ <sup>-/-</sup> chimeras.

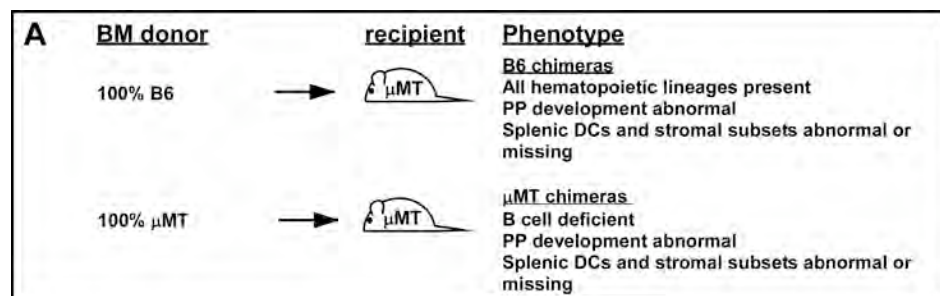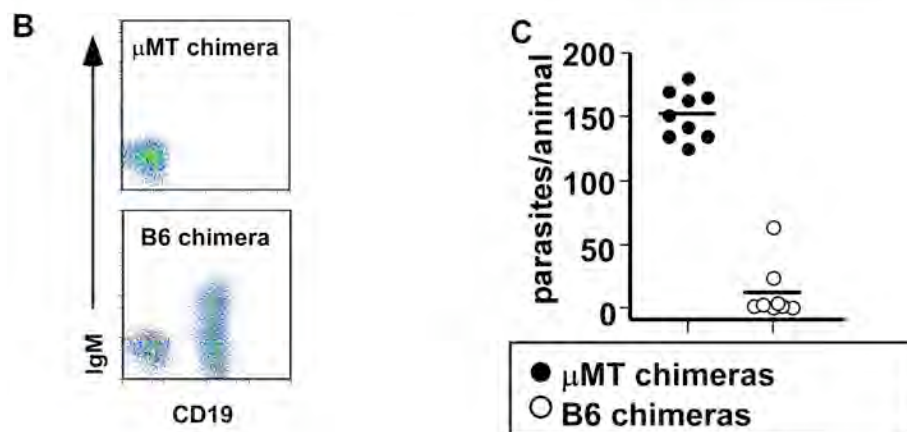

Supplemental Fig. 1 Wojciechowski et al

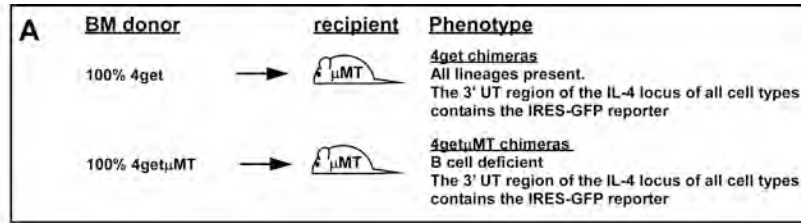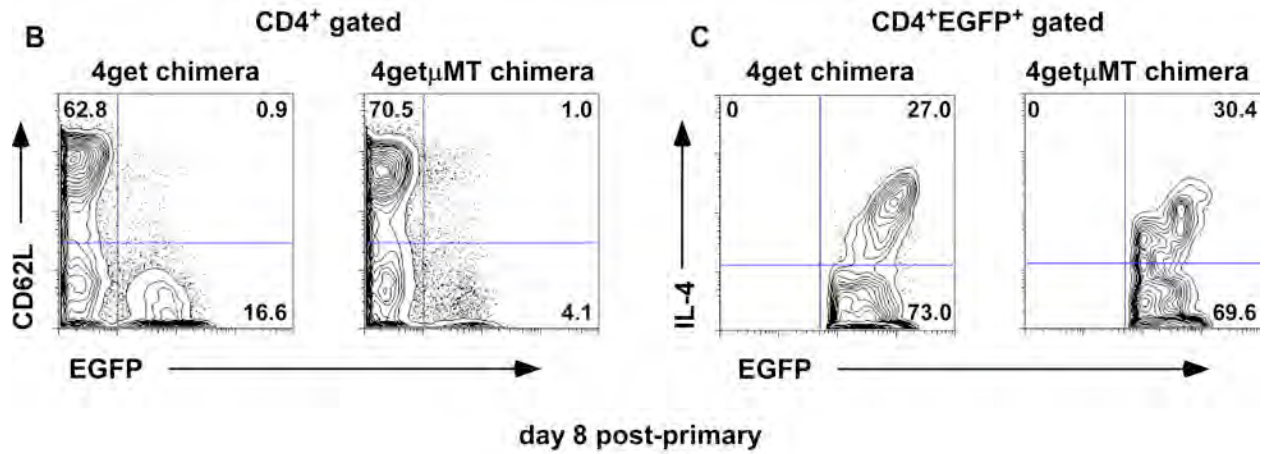

Supplemental Figure 2 Wojciechowski et al

| <u>BM donor</u>                                                   | <u>recipient</u>                                                                  | <u>Phenotype</u>                                                                                                                                                                                                      |
|-------------------------------------------------------------------|-----------------------------------------------------------------------------------|-----------------------------------------------------------------------------------------------------------------------------------------------------------------------------------------------------------------------|
| 75% 4get $\mu$ MT + 25% $\mu$ MT                                  | 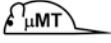 | <u><math>\mu</math>MT chimeras</u><br>B cell deficient<br>The 3' UT region of the IL-4 locus of 75% of all hematopoietic cells contains the IRES-GFP reporter                                                         |
| 75% 4get $\mu$ MT + 25% B6                                        | 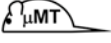 | <u>B-WT chimeras</u><br>B cells present and normal<br>The 3' UT region of the IL-4 locus of 75% of all hematopoietic cells contains the IRES-GFP reporter                                                             |
| 75% 4get $\mu$ MT + 25% $\mu$ S <sup>-/-</sup> AID <sup>-/-</sup> | 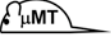 | <u>B-<math>\mu</math>S<sup>-/-</sup>AID<sup>-/-</sup> chimeras</u><br>B cells present but unable to secrete Ab<br>The 3' UT region of the IL-4 locus of 75% of all hematopoietic cells contains the IRES-GFP reporter |

**Supplemental Figure 3 Wojciechowski et al**

A.

| BM donor                                | recipient                                                                         | Phenotype                                                                                                                                        |
|-----------------------------------------|-----------------------------------------------------------------------------------|--------------------------------------------------------------------------------------------------------------------------------------------------|
| 100% $\mu$ MT                           | 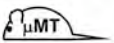 | <u><math>\mu</math>MT chimeras</u><br>B cell deficient<br>All other cell types competent to express MHCII                                        |
| 75% $\mu$ MT + 25% B6                   | 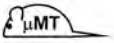 | <u>B-WT chimeras</u><br>B cells present and normal<br>All cell types competent to express MHCII                                                  |
| 75% $\mu$ MT + 25% MHCII <sup>-/-</sup> | 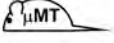 | <u>B-MHCII<sup>-/-</sup> chimeras</u><br>B cells present but unable to express MHCII<br>Other hematopoietic cells are competent to express MHCII |

B.

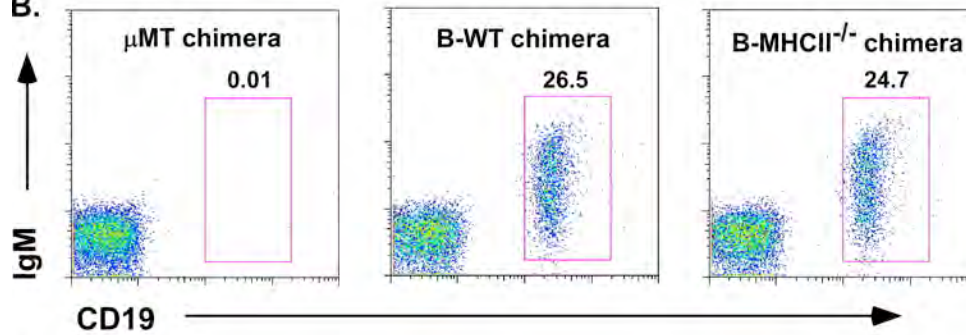

C.

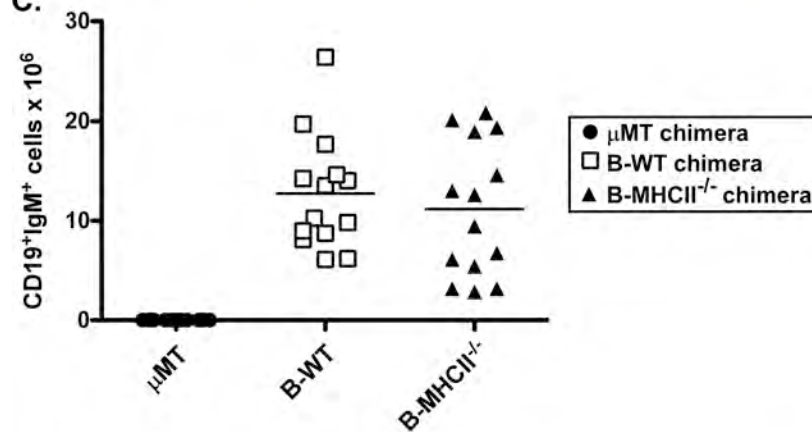

D.

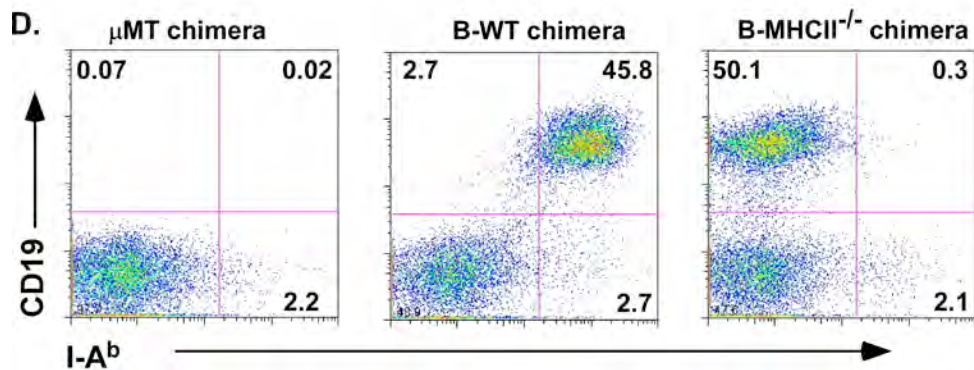

Supplemental Figure 4 Wojciechowski et al

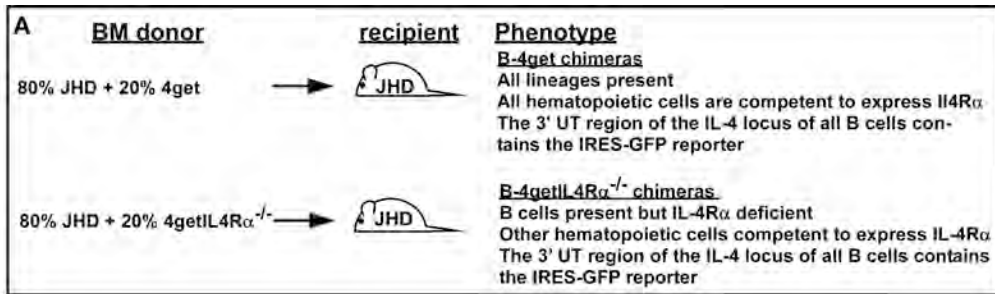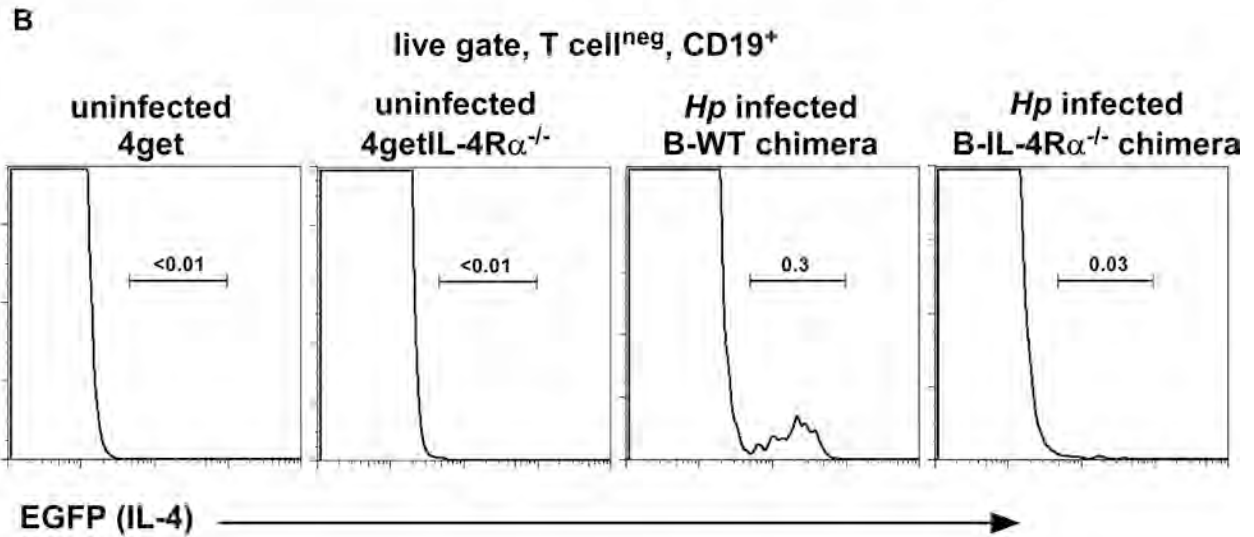

Supplemental Figure 5 Wojciechowski et al

| <u>BM donor</u>                                |   | <u>recipient</u>                                                                    | <u>Phenotype</u>                                                                                                                                                                |
|------------------------------------------------|---|-------------------------------------------------------------------------------------|---------------------------------------------------------------------------------------------------------------------------------------------------------------------------------|
| 100% $\mu$ MT                                  | → | 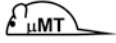   | <u><math>\mu</math>MT chimeras</u><br>B cell deficient<br>All hematopoietic cells competent to express cytokines                                                                |
| 75% $\mu$ MT + 25% B6                          | → | 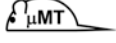   | <u>B-WT chimeras</u><br>All lineages present<br>All hematopoietic cells competent to express cytokines                                                                          |
| 75% $\mu$ MT + 25% IL-4 <sup>-/-</sup>         | → | 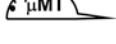   | <u>B-IL-4<sup>-/-</sup> chimeras</u><br>B cells present but unable to express IL-4<br>Other hematopoietic cells are competent to express IL-4                                   |
| 75% $\mu$ MT + 25% IL-2 <sup>-/-</sup>         | → | 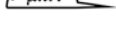   | <u>B-IL-2<sup>-/-</sup> chimeras</u><br>B cells present but unable to express IL-2<br>Other hematopoietic cells are competent to express IL-2                                   |
| 75% $\mu$ MT + 25% TNF $\alpha$ <sup>-/-</sup> | → | 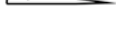   | <u>B-TNF<math>\alpha</math><sup>-/-</sup> chimeras</u><br>B cells present but unable to express TNF $\alpha$<br>Other hematopoietic cells are competent to express TNF $\alpha$ |
| 100% IL-4 <sup>-/-</sup>                       | → | 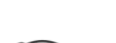   | <u>IL-4<sup>-/-</sup> chimeras</u><br>All lineages present<br>IL-4 deficient in all hematopoietic cells                                                                         |
| 100% IL-2 <sup>-/-</sup>                       | → | 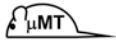 | <u>IL-2<sup>-/-</sup> chimeras</u><br>All lineages present<br>IL-2 deficient in all hematopoietic cells                                                                         |
| 100% TNF $\alpha$ <sup>-/-</sup>               | → | 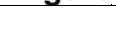 | <u>TNF<math>\alpha</math><sup>-/-</sup> chimeras</u><br>All lineages present<br>TNF $\alpha$ deficient in all hematopoietic cells                                               |

**Supplemental Figure 6 Wojciechowski et al**
